# Supplementary material for: Tree rings provide a new class of phenotypes for genetic associations that foster insights into adaptation of conifers to climate change
Source: PubMed Central journal article supplement (PMC6079641; doi:10.1111/nph.14968), 2018-01-04
Supplement: NPH-218-630-s001.pdf [file NPH-218-630-s001.pdf]

## ***New Phytologist* Supporting Information**

Article title: Tree rings provide a new class of phenotypes for genetic associations that foster insights into adaptation of conifers to climate change

Authors: Johann M. Housset, Simon Nadeau, Nathalie Isabel, Claire Depardieu, Isabelle Duchesne, Patrick Lenz, Martin P. Girardin

Article acceptance date: 21 November 2017

The following Supporting Information is available for this article:

**Fig. S1** Monthly mean temperature, drought code, minimum temperature and precipitation in 2002 and 2003 at Valcartier, compared to inter-annual variability during the 1993-2014 period.

**Fig. S2** Spring mean temperature and August drought code in year 2003, and number of days with minimum temperature below zero in October 2002 at Valcartier, compared to inter-annual variability in standardized residual BAI scores.

**Fig. S3** Correlation analysis for climatic sensitivity traits basal area increment and monthly temperature.

**Fig. S4** Correlation analysis for climatic sensitivity traits basal area increment and monthly drought code.

**Fig. S5** Genetic structure assessed through a discriminant analysis of principal components (DAPC).

**Fig. S6** Correlation analysis for climatic sensitivity traits basal area increment and monthly number of days below 0 °C.

**Fig. S7** Correlation analysis for climatic sensitivity traits basal area increment and monthly precipitation.

**Fig. S8** Comparison of growth-climate relationships at the provenance and at the individual levels.

**Fig. S9** Correlation analysis for climatic sensitivity traits ring average density and monthly drought code.

**Fig. S10** Correlation analysis for climatic sensitivity traits ring density and monthly mean temperature.

**Table S1** Summary of provenances location, mean annual temperature of provenance, mean annual precipitation and number of sampled trees per provenance.

**Table S2** Spearman rank correlations between monthly climate variables.

**Table S3** Detailed results of the Genotype Phenotype Association (GPA) analysis with TASSEL.

**Table S4** Detailed results of the Genotype Phenotype Association (GPA) analysis with TASSEL when excluding the two populations from the southern group.

**Table S5** Comparisons between the number of SNPs detected in GPAs with TASSEL between candidate and non-candidate SNPs.

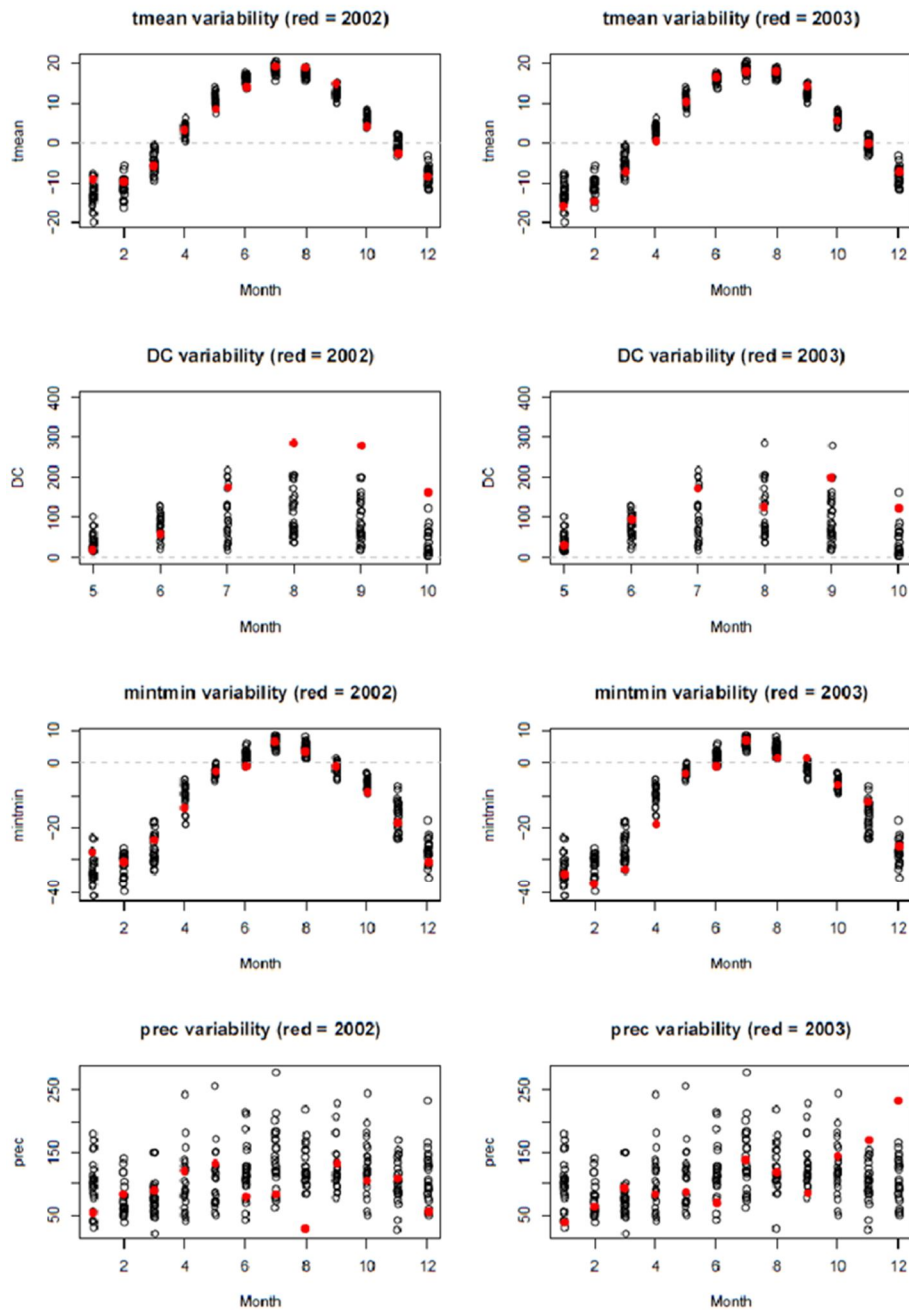

**Fig. S1** Monthly mean temperature (tmean), drought code (DC), minimum temperature (mintmin) and precipitation (prec) in 2002 and 2003 (red point) at Valcartier, compared to inter-annual variability during the 1993-2014 period (black points).

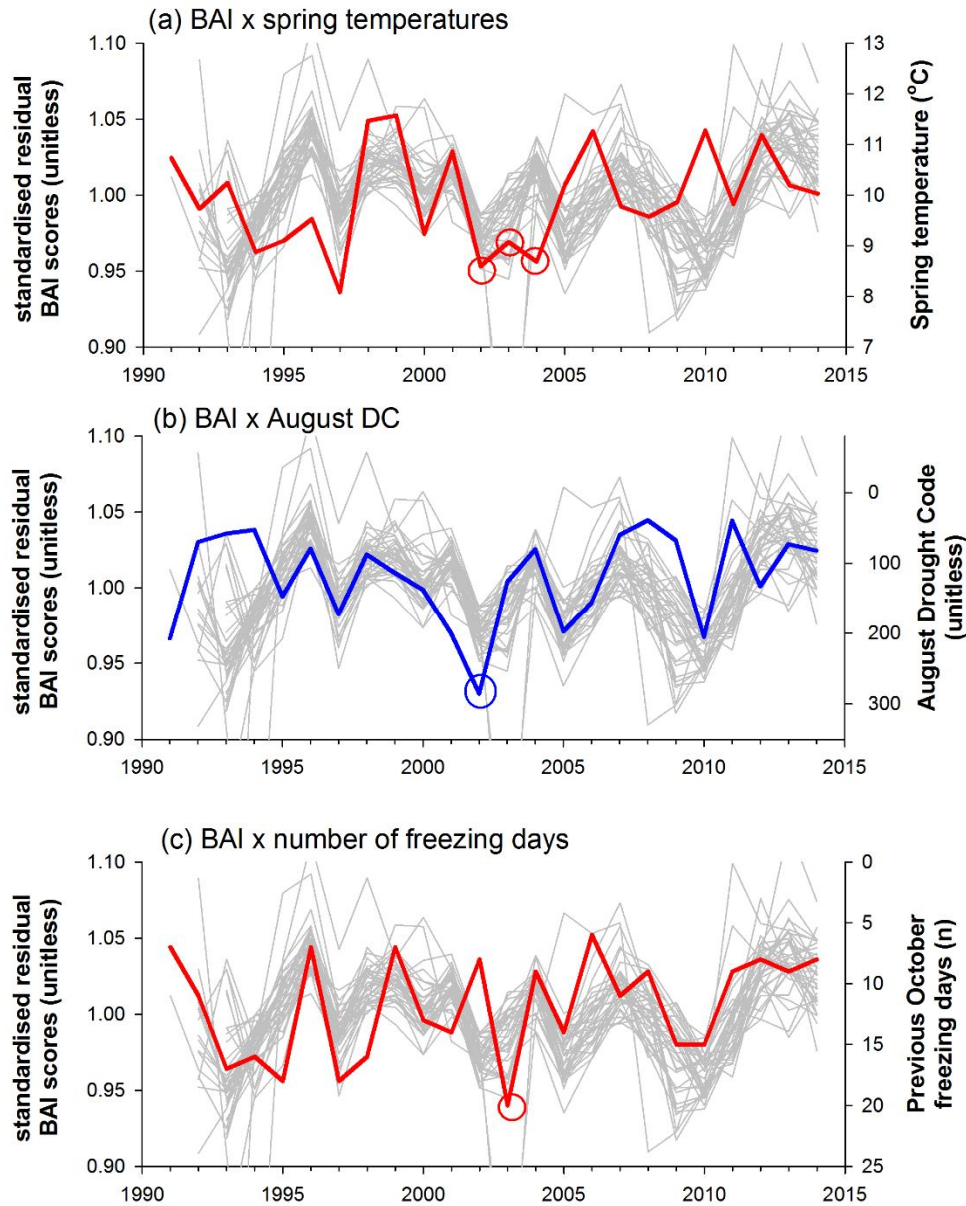

**Fig. S2** (a) Spring (April-May) mean temperature and (b) August drought code (DC), and (c) number of days with minimum temperature below zero at Valcartier, compared to inter-annual variability in standardized residual BAI scores (grey lines). Note the inverted y-scale in b) and c). Drought Code is unitless and ranges from 0 to about 800, with low values indicating low drought risk and high values indicating high drought risk. Anomalies of 2002-2004 are circled.

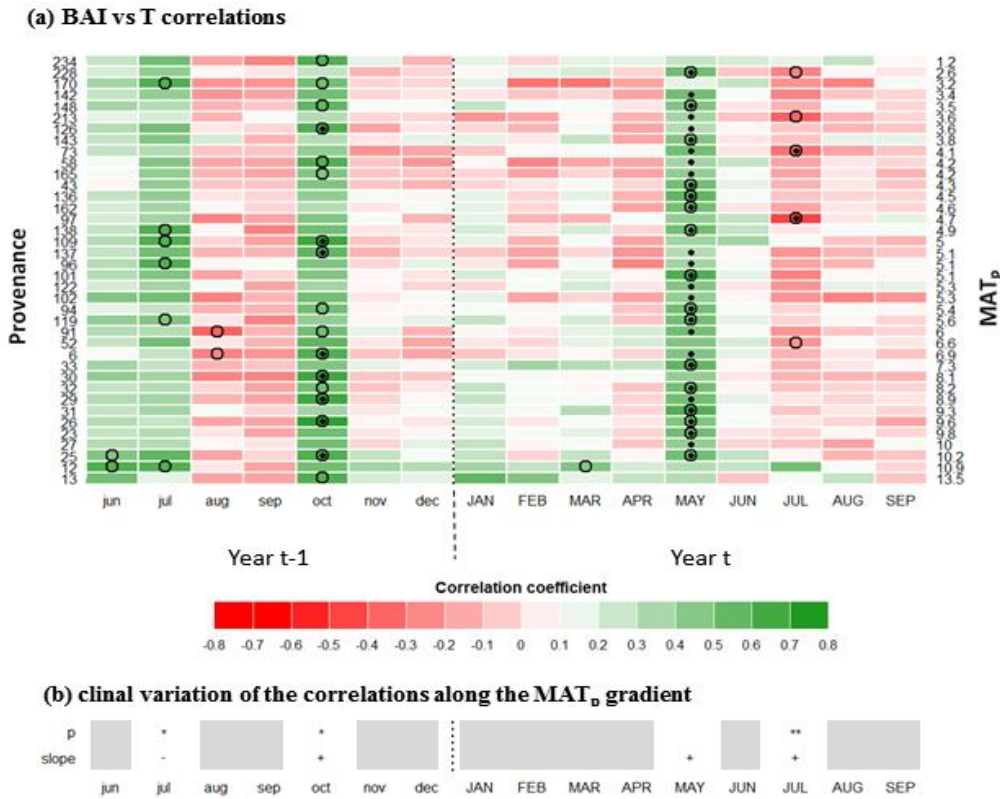

**Fig. S3** Correlation analysis for climatic sensitivity (CS) traits basal area increment (BAI) and monthly temperature (T). This figure is the same as in Fig. 4 but with the addition of the significant coefficients for the bootstrapped response function method, indicated by dots. Analyses were computed between *P. strobus* standardized residuals of BAI scores (Fig. 3b) and monthly mean temperature at the Valcartier common garden experiment (Quebec, Canada) over the 1993–2014 period. Provenances (rows) are ordered by increasing mean annual temperature of the provenance (MAT<sub>p</sub>; right axis labels). Months in capital letters represent the current year of ring formation; months in lower case represent climate variables during the year preceding ring formation. Significant coefficients are represented by circles. **(b)** Test for clinal variations in correlation coefficients along the MAT<sub>p</sub> gradient: *p* value and slope sign of a regression against MAT<sub>p</sub>. Significance codes: •: *p* < 0.1; \*: *p* < 0.05; \*\*: *p* < 0.01; \*\*\*: *p* < 0.001. The response function analysis give credence to the correlation analysis by indicating significant positive relationship between standardised residual BAI scores and October temperature the year previous to ring formation and May temperature of the year current to ring formation.

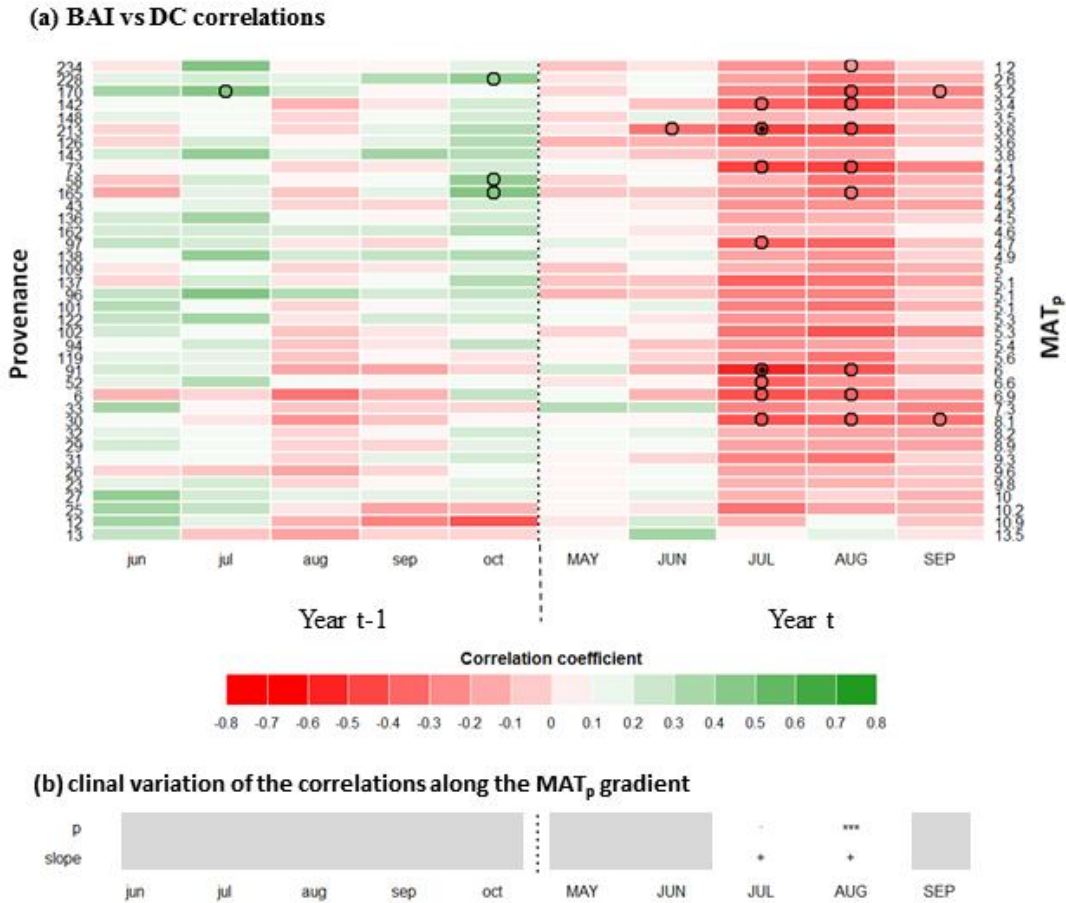

**Fig. S4** Correlation analysis for climatic sensitivity (CS) traits basal area increment (BAI) and monthly drought code (DC). This figure is the same as in Fig. 5 but with the addition of the significant coefficients for the bootstrapped response function method, indicated by dots. Analyses were computed between *P. strobus* standardized residuals of BAI scores (Fig. 3b) and monthly DC at the Valcartier common garden experiment (Quebec, Canada) over the 1993–2014 period. Populations (rows) are ordered by increasing mean annual temperature of the provenance (MAT<sub>p</sub>; right axis labels). Months in capital letters represent the current year of ring formation; months in lower case represent climate variables during the year preceding ring formation. Significant coefficients are represented by circles. **(b)** Test for clinal variations in correlation coefficients along the MAT<sub>p</sub> gradient: *p* value and slope sign of a regression against MAT<sub>p</sub>. Significance codes: •:  $p < 0.1$ ; \*:  $p < 0.05$ ; \*\*:  $p < 0.01$ ; \*\*\*:  $p < 0.001$ .

**Fig. S5** (*Next two pages*). Genetic structure assessed through a discriminant analysis of principal components (DAPC, Jombart *et al.* 2010): **(a)** BIC versus the number of clusters in successive k-means clustering analysis, **(b)** barplot of membership probabilities for  $k = 3$  clusters (each bar represent an individual tree), **(c)** geographic map of populations' membership probabilities for  $k = 3$  clusters. To estimate population structure (Q-matrix), we ran DAPC using the 128 genotyped SNPs. In a preliminary DAPC analysis, we found that a weaker structure was detected when we excluded the 21 candidate SNPs from Nadeau *et al.* (2016) since these SNPs have higher  $F_{ST}$  ( $F_{ST} = 0.074$ ,  $H_O = 0.311$ ) as compared to non-candidate SNPs ( $F_{ST} = 0.040$ ,  $H_O = 0.329$ ). This was expected because these SNPs showed the highest among-population differentiation in  $F_{ST}$  outlier and GEA tests (Nadeau *et al.* 2016). Because we cannot exclude the hypothesis that a proportion of the candidate SNPs are false positives, we chose the more conservative approach of including them in DAPC analyses to avoid under correcting for population structure in TASSEL models. To obtain better estimates of cluster membership probabilities in DAPC analyses, we combined the 225 genotyped trees from this study with 821 additional trees (133 provenances) sampled across the entire range and genotyped on the same set of SNPs (Nadeau *et al.* 2015). SNP data for the 1046 individuals was first transformed into principal components (PCs) to satisfy DAPC requirements of uncorrelated variables. The first 40 PCs that explained more than 1% of the variation (total variation explained: 59%) were included in DAPC analyses (varying the number of PCs did not affect the results). Successive k-means clustering from  $k = 1$  to  $k = 10$  clusters suggested that  $k = 5$  to  $k = 7$  clusters best explained the data (Figure S2A, lowest value of the Bayesian Information Criterion, BIC). However, for  $k = 4$  or higher, the clusters were highly admixed and could not be clearly geographically delimited (not shown). Thus, we used the membership probabilities for  $k = 3$  clusters (Figs. S3B and S3C) as the Q matrix to correct for population structure in TASSEL analyses. The 3 clusters detected are similar to previous results from Nadeau *et al.* (2015) using the software STRUCTURE. The red cluster represents the southern group, and the blue and green clusters represent the northern group with a weak pattern of differentiation from west to east (individuals within the northern group are ordered by longitude in Fig. S3B).

(a)

Value of BIC versus the number of clusters

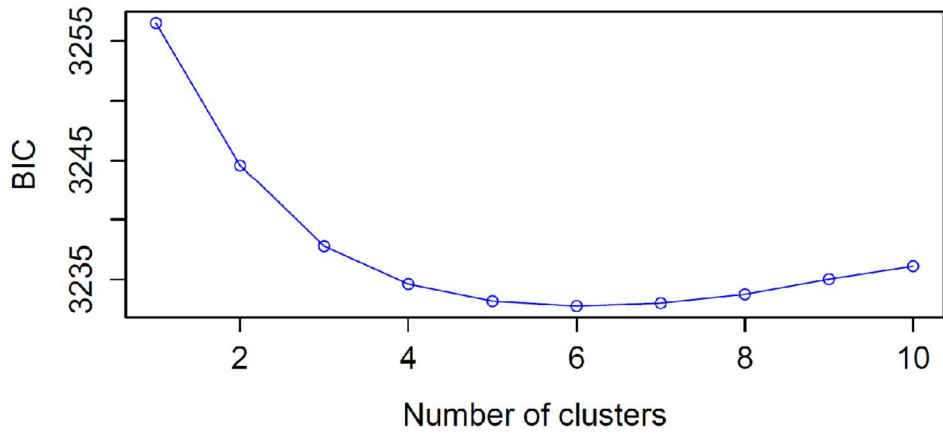

(b)

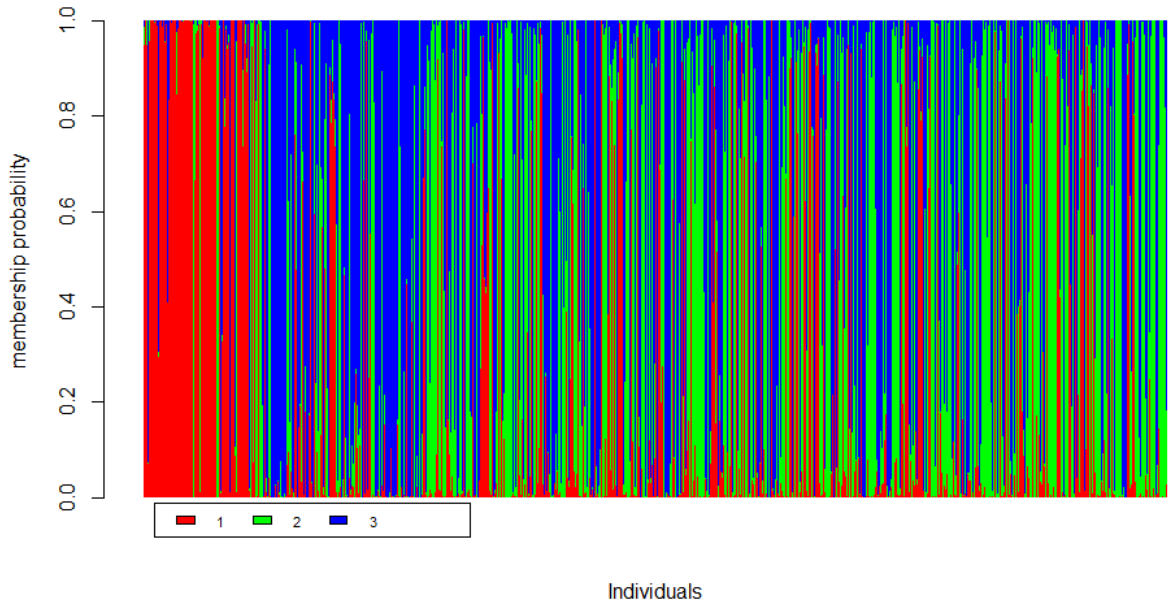



(c)

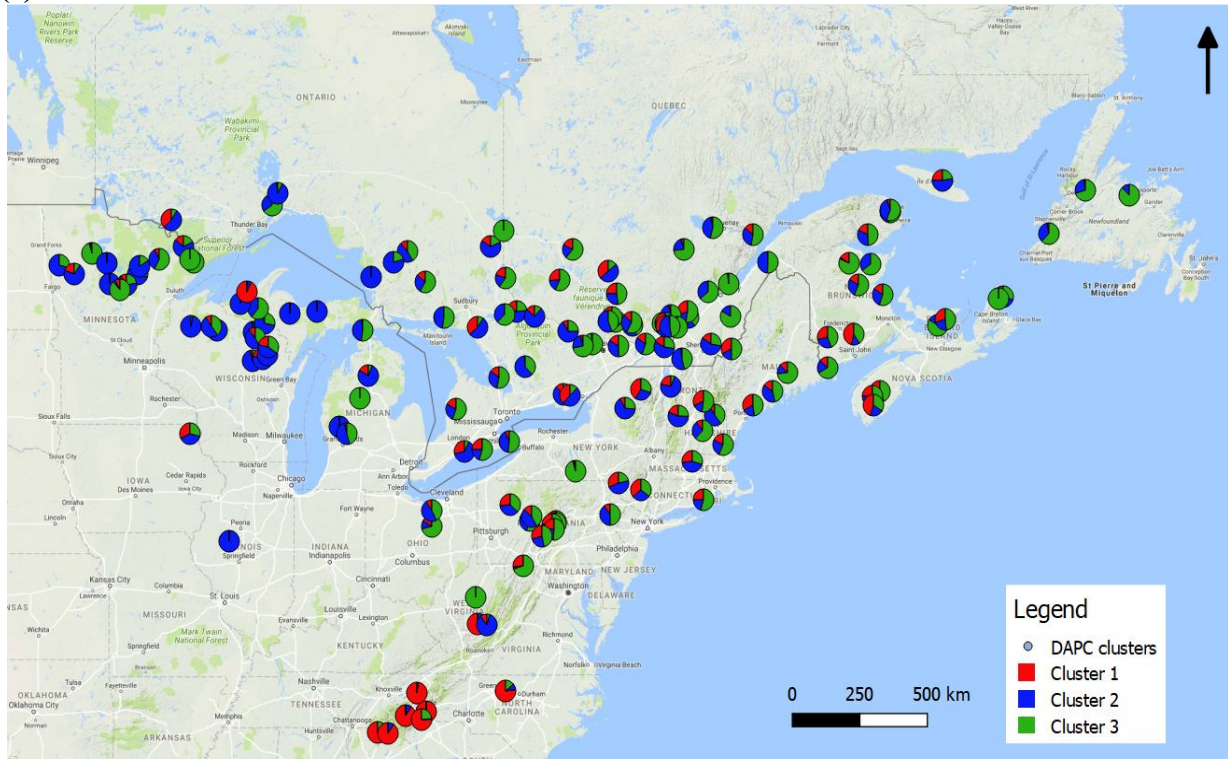

**Fig. S6** (Next page) Correlation analysis for climatic sensitivity (CS) traits basal area increment (BAI) and monthly number of days below 0 °C (freezing days). **(a)** Bootstrapped correlation coefficients were computed between *Pinus strobus* BAI residual chronologies and the monthly number of freezing days at Valcartier common garden plantation (Québec, Canada) for the period 1993-2014. Provenances (rows) are ordered by increasing mean annual temperature of provenance ( $MAT_p$ ; right axis labels). Months in capital letters represent the current year of ring formation; months in lower case represent climate variables during the year preceding ring formation. Significant correlations are represented by dots for the bootstrapped principal component regression method and by circles for the bootstrapped correlation method. **(b)** Test for clinal variations in the correlation coefficients along the  $MAT_p$  gradient:  $p$  value and slope sign of a regression against  $MAT_p$ . Significativity codes: “.”  $p<0.1$ ; “\*”  $p<0.05$ ; “\*\*”:  $p<0.01$ ; “\*\*\*”:  $p<0.001$ .

(a) BAI-freezing days correlations

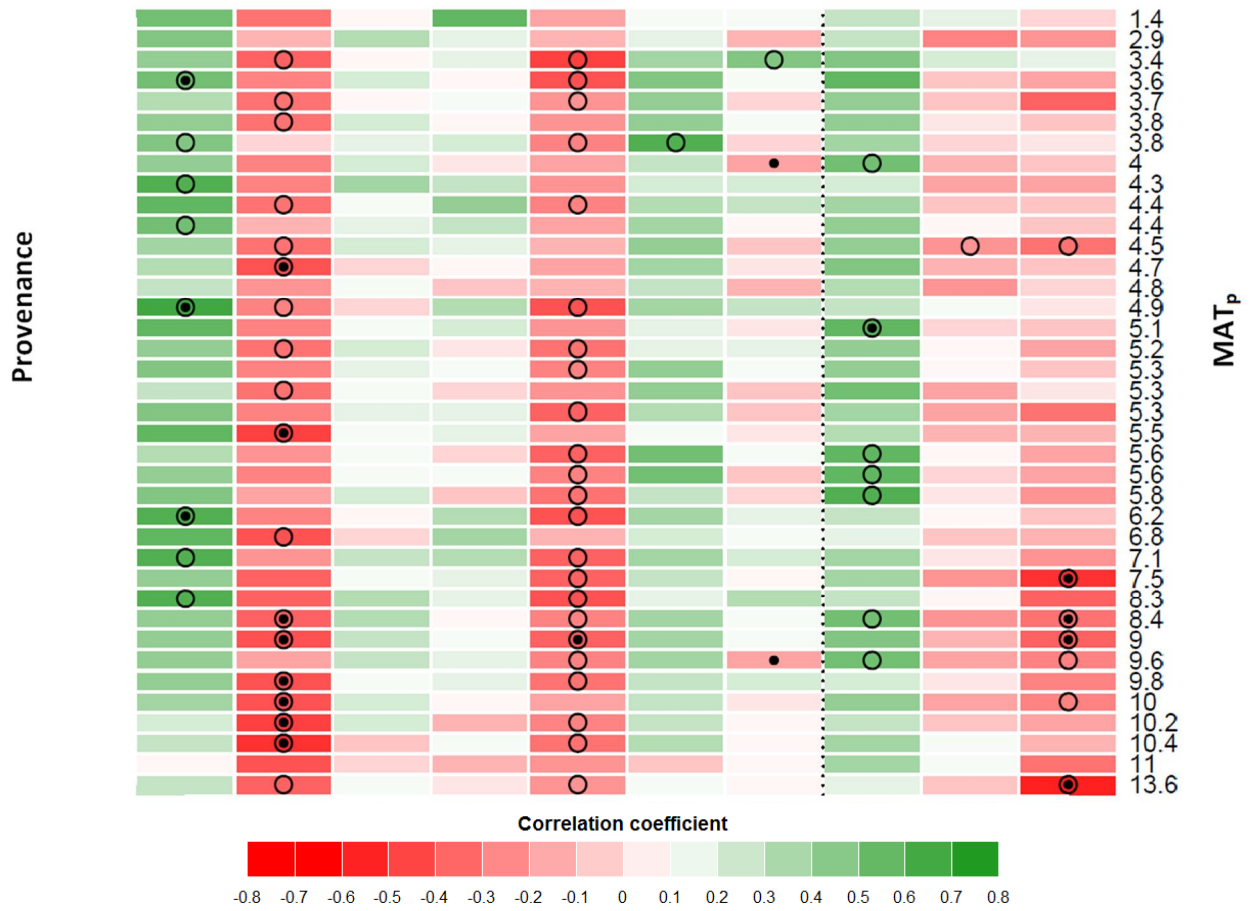

(b) clinal variation of the correlations along the MAT<sub>p</sub> gradient

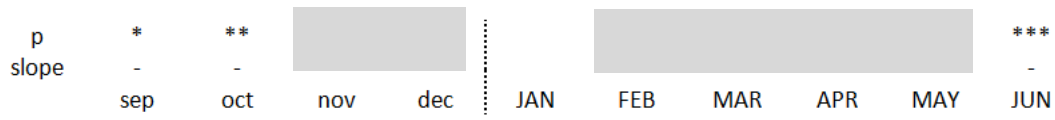

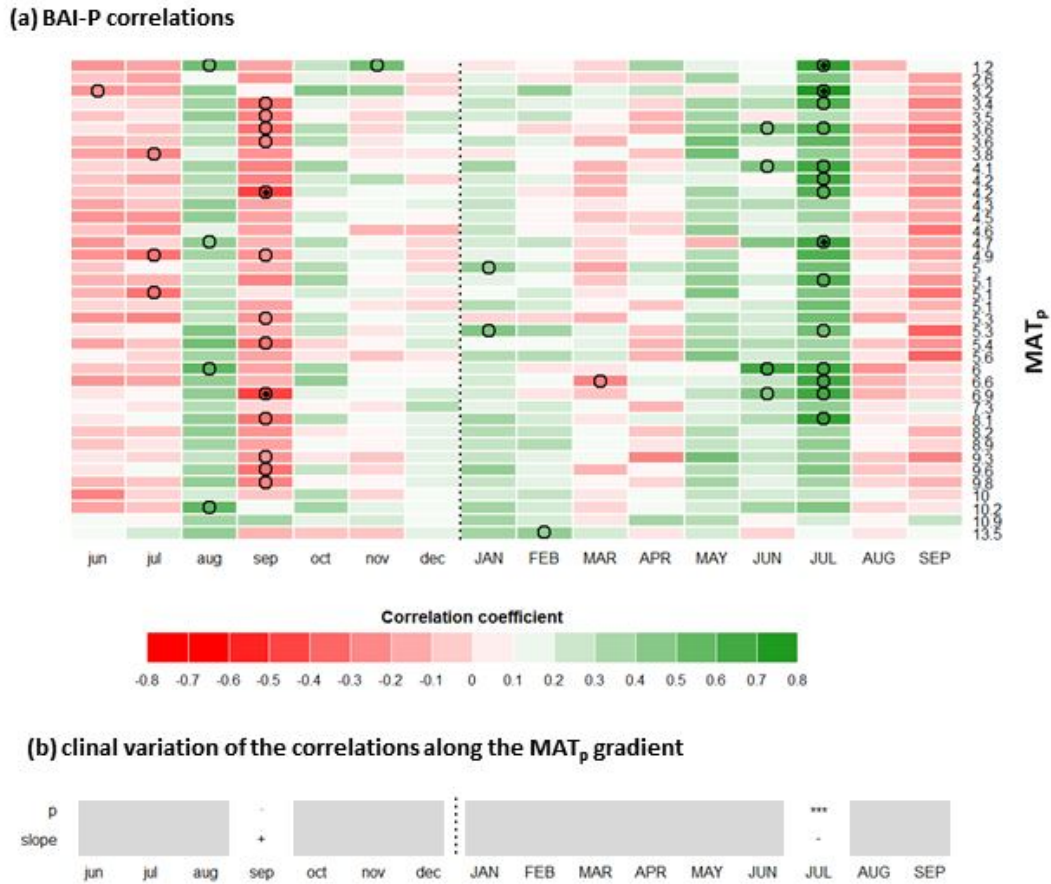

**Fig. S7** Correlation analysis for climatic sensitivity (*CS*) traits basal area increment (BAI) and monthly precipitation. **(a)** Bootstrapped correlation coefficients were computed between *Pinus strobus* BAI residual chronologies and the monthly mean precipitation at Valcartier common garden plantation (Québec, Canada) for the period 1994-2014. Provenances (rows) are ordered by increasing mean annual temperature of provenance ( $MAT_p$ ; right axis labels). Months in capital letters represent the current year of ring formation; months in lower case represent climate variables during the year preceding ring formation. Significant correlations are represented by dots for the bootstrapped principal component regression method and by circles for the bootstrapped correlation method. **(b)** Test for clinal variations in the correlation coefficients along the  $MAT_p$  gradient:  $p$  value and slope sign of a regression against  $MAT_p$ . Significativity codes: “.”  $p < 0.1$ ; “\*”  $p < 0.05$ ; “\*\*”  $p < 0.01$ ; “\*\*\*”  $p < 0.001$ .

**Fig. S8** (*Next two pages*) Comparison of growth-climate relationships at the provenance and at the individual levels. Bootstrapped correlation coefficients were computed between *Pinus strobus* basal area increment residual chronologies and the monthly climatic variables at Valcartier common garden plantation (Québec, Canada) for the period 1993-2014. Provenances or individuals (rows) are ordered by increasing mean annual temperature of provenance ( $MAT_p$ ; right axis labels). Months in capital letters represent the current year of ring formation; months in lower case represent climate variables during the year preceding ring formation. Significant correlations are represented by dots for the bootstrapped principal component regression method and by circles for the bootstrapped correlation method.

**Population level (one row per provenance)**

**Individual level (one row per individual)**

**B  
A  
I  
v  
s  
T**

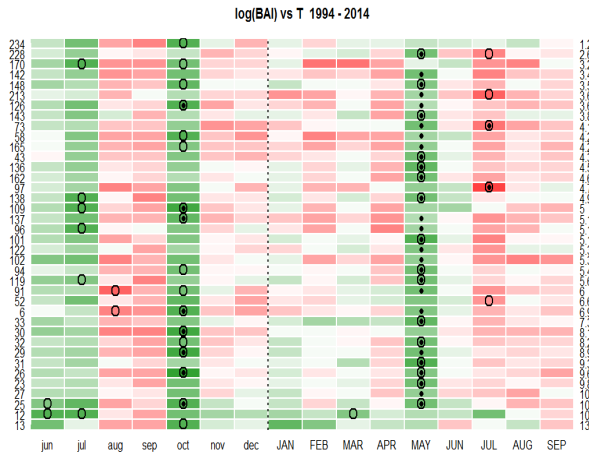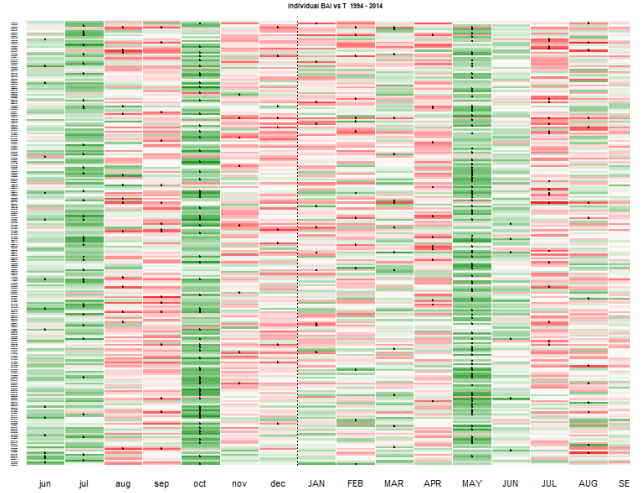

**B  
A  
I  
v  
s  
P**

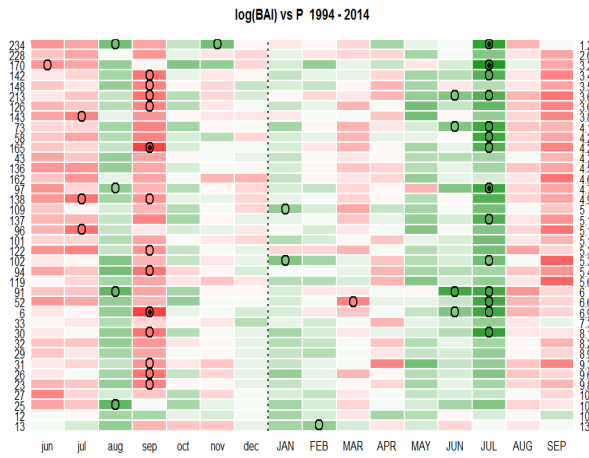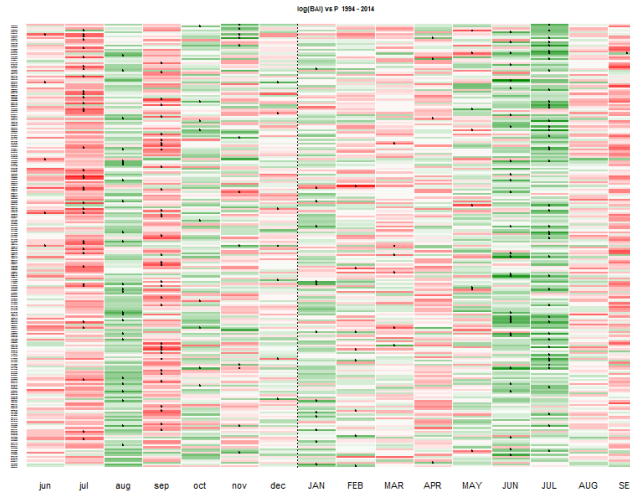

**B  
A  
I  
v  
s  
D  
C**

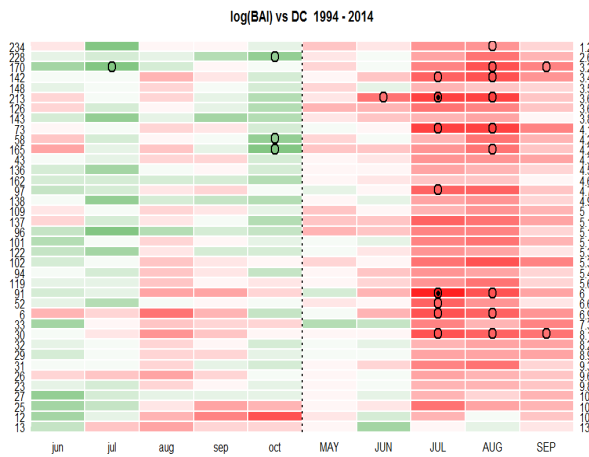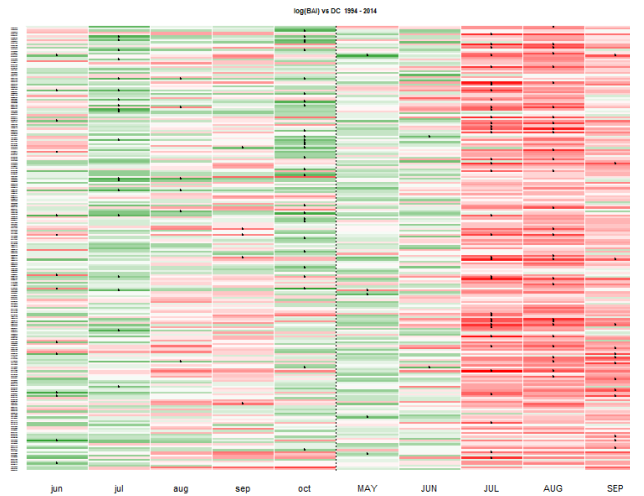



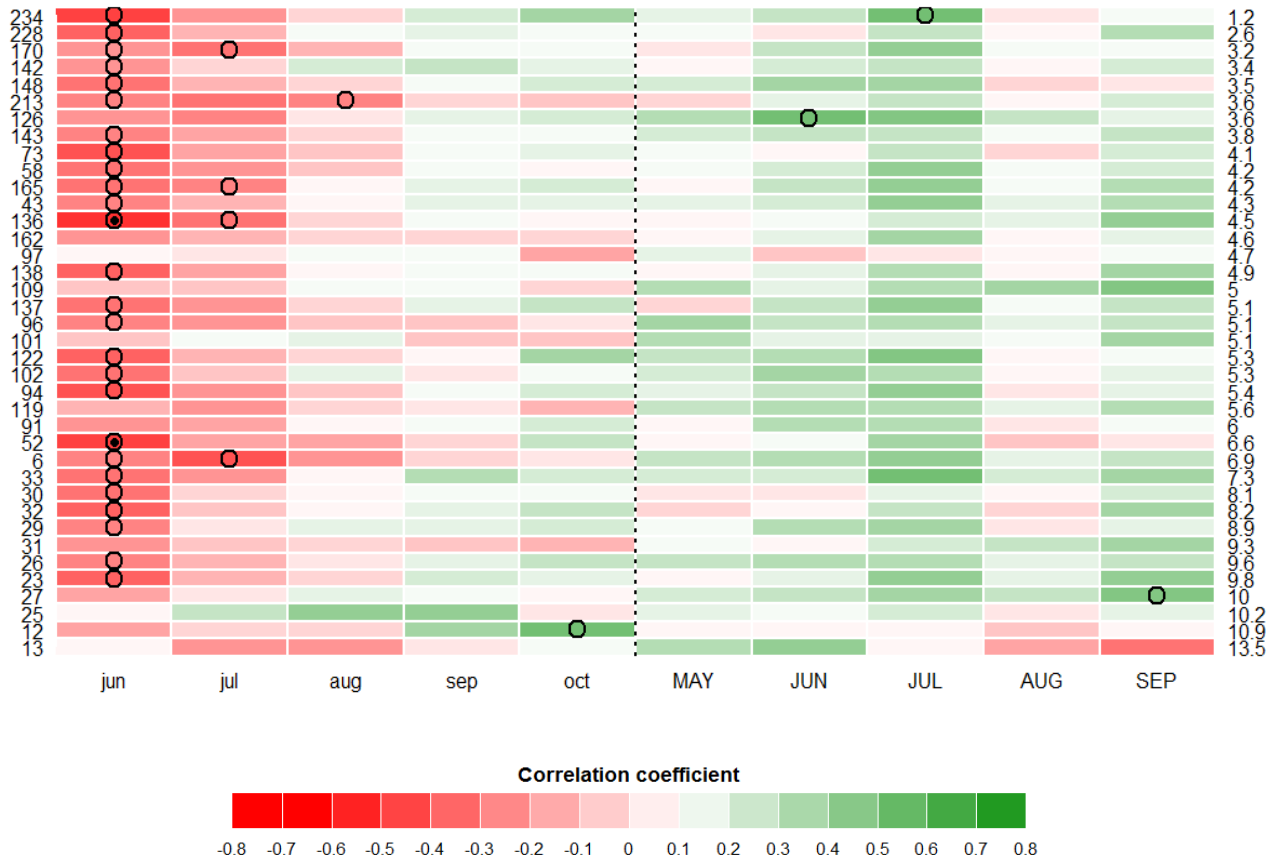

**Fig. S9** Correlation analysis for climatic sensitivity (*CS*) traits ring average density and monthly drought code (*DC*). Bootstrapped correlation coefficients were computed between *Pinus strobus* mean annual density residual chronologies and the monthly drought code at Valcartier common garden plantation (Québec, Canada) for the period 1994-2014. Provenances (rows) are ordered by increasing mean annual temperature of provenance ( $MAT_p$ ; right axis labels). Months in capital letters represent the current year of ring formation; months in lower case represent climate variables during the year preceding ring formation. Significant correlations are represented by dots for the bootstrapped principal component regression method and by circles for the bootstrapped correlation method.



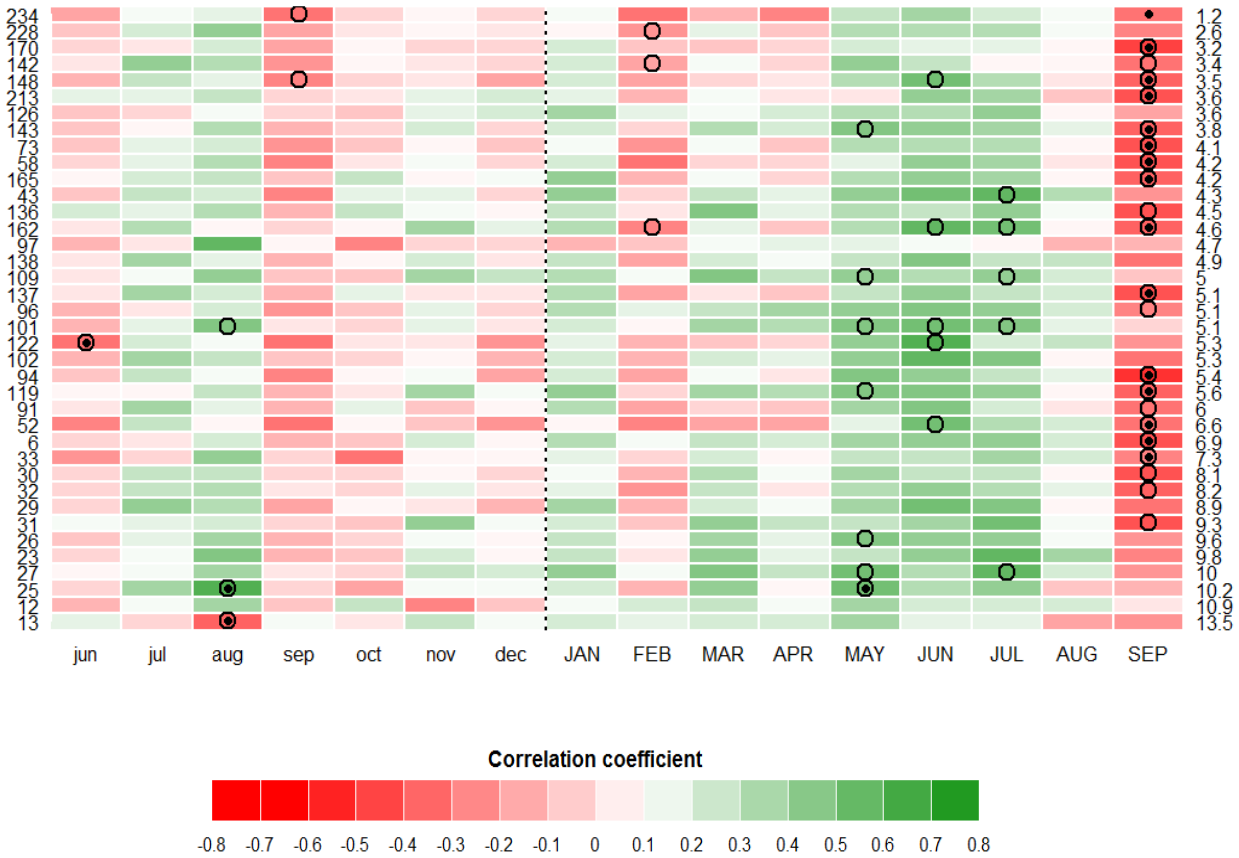

**Fig. S10** Correlation analysis for climatic sensitivity (*CS*) traits ring density and monthly mean temperature. Bootstrapped correlation coefficients were computed between *Pinus strobus* mean annual density residual chronologies and the monthly mean temperature at Valcartier common garden plantation (Québec, Canada) for the period 1993-2014. Provenances (rows) are ordered by increasing mean annual temperature of provenance ( $MAT_p$ ; right axis labels). Months in capital letters represent the current year of ring formation; months in lower case represent climate variables during the year preceding ring formation. Significant correlations are represented by dots for the bootstrapped principal component regression method and by circles for the bootstrapped correlation method.

**Table S1** Summary of provenances location, mean annual temperature of provenance (MATp), mean annual precipitation (MAPp) and number of sampled trees per provenance.

| <b>Id</b> | <b>Province/State</b> | <b>Provenance name</b>     | <b>Latitude</b> | <b>Longitude</b> | <b>Altitude (m a.s.l.)</b> | <b>MATp (°C)</b> | <b>MAPp (mm)</b> | <b>Number</b> |
|-----------|-----------------------|----------------------------|-----------------|------------------|----------------------------|------------------|------------------|---------------|
| 234       | ONTARIO               | MACDIARMID                 | 49.16           | -88.09           | 261                        | 1.41             | 839              | 5             |
| 228       | ONTARIO               | ATIKOKAN                   | 48.38           | -92.14           | 392                        | 2.86             | 756              | 5             |
| 170       | QUEBEC                | LAC BEAUCHENE              | 46.40           | -79.00           | 349                        | 3.41             | 1009             | 5             |
| 142       | QUEBEC                | CANTON RIVARD              | 46.15           | -75.20           | 251                        | 3.63             | 1011             | 6             |
| 148       | QUEBEC                | DEUX RIVIERES              | 46.16           | -78.18           | 311                        | 3.72             | 879              | 10            |
| 126       | QUEBEC                | LAC LABELLE                | 46.05           | -74.55           | 255                        | 3.84             | 1075             | 5             |
| 213       | MINNESOTA             | MARCELL                    | 47.35           | -94.40           | 425                        | 3.84             | 689              | 6             |
| 143       | QUEBEC                | LAC 31 MILLES              | 46.15           | -75.50           | 229                        | 3.98             | 1003             | 6             |
| 73        | QUEBEC                | BISHOPTON                  | 45.35           | -71.33           | 394                        | 4.27             | 1190             | 7             |
| 58        | ONTARIO               | MINDEN 1                   | 45.00           | -78.40           | 396                        | 4.42             | 1039             | 6             |
| 165       | QUEBEC                | CANTON DE CALONNE          | 46.30           | -73.10           | 94                         | 4.43             | 1022             | 7             |
| 43        | NEW YORK              | ADIRONDACK MOUNTAINS       | 43.56           | -74.50           | 603                        | 4.53             | 1279             | 8             |
| 136       | QUEBEC                | PEPINIERE GRANDES PILES    | 46.40           | -72.45           | 26                         | 4.68             | 1041             | 7             |
| 162       | QUEBEC                | ST ETIENNE DES GRES        | 46.25           | -72.40           | 34                         | 4.78             | 1012             | 6             |
| 97        | QUEBEC                | ILE AUX ALLUMETTES         | 45.54           | -77.01           | 151                        | 4.89             | 807              | 5             |
| 138       | QUEBEC                | ST ALPHONSE DE RODRIGUEZ   | 46.10           | -73.40           | 76                         | 5.13             | 1006             | 6             |
| 109       | QUEBEC                | ST GERARD D YAMASKA        | 46.00           | -72.50           | 62                         | 5.20             | 1038             | 5             |
| 137       | QUEBEC                | ST-NORBERT                 | 46.10           | -73.30           | 40                         | 5.30             | 997              | 7             |
| 96        | QUEBEC                | DAVIDSON                   | 45.53           | -76.46           | 116                        | 5.34             | 842              | 6             |
| 101       | QUEBEC                | MONT-ROLLAND               | 45.56           | -74.07           | 75                         | 5.34             | 1039             | 6             |
| 122       | QUEBEC                | JOLIETTE                   | 46.03           | -73.27           | 23                         | 5.45             | 997              | 7             |
| 102       | QUEBEC                | LAC DANFORD                | 45.56           | -76.09           | 109                        | 5.56             | 893              | 4             |
| 94        | QUEBEC                | LAC VERT                   | 45.51           | -75.08           | 62                         | 5.64             | 965              | 7             |
| 119       | QUEBEC                | STE PHILOMENE              | 46.02           | -73.11           | 18                         | 5.82             | 978              | 7             |
| 91        | QUEBEC                | ST EIPHANIE                | 45.50           | -73.33           | 22                         | 6.17             | 1019             | 7             |
| 52        | ONTARIO               | TWEED                      | 44.29           | -77.19           | 140                        | 6.75             | 915              | 6             |
| 6         | MAINE                 | SEARSMONT                  | 44.36           | -69.20           | 65                         | 7.09             | 1217             | 7             |
| 33        | CONNECTICUT           | YALE UNION FOREST EASTFORD | 41.55           | -75.05           | 314                        | 7.51             | 1066             | 4             |
| 30        | PENNSYLVANIA          | CLEARFIELD                 | 41.01           | -78.26           | 459                        | 8.28             | 1019             | 7             |
| 32        | PENNSYLVANIA          | COOKSBURG                  | 41.20           | -79.15           | 474                        | 8.38             | 1137             | 8             |
| 29        | PENNSYLVANIA          | MADERA                     | 40.55           | -78.30           | 428                        | 9.04             | 1033             | 6             |
| 31        | OHIO                  | OHIO FINDLEY STATE PARK    | 41.10           | -82.15           | 291                        | 9.56             | 950              | 6             |
| 26        | PENNSYLVANIA          | POTTERS MILLS              | 40.48           | -77.38           | 529                        | 9.76             | 1204             | 6             |
| 23        | PENNSYLVANIA          | HUNTINGTON & WARREN CO     | 40.29           | -78.01           | 378                        | 10.02            | 1012             | 7             |

|    |                   |                    |       |        |      |       |      |   |
|----|-------------------|--------------------|-------|--------|------|-------|------|---|
|    | A                 |                    |       |        |      |       |      |   |
| 27 | PENNSYLVANI<br>A  | SWAMP HOUSE HOLLOW | 40.50 | -77.30 | 274  | 10.17 | 1069 | 6 |
| 25 | PENNSYLVANI<br>A  | VIRA               | 40.40 | -77.33 | 253  | 10.38 | 1060 | 8 |
| 12 | NORTH<br>CAROLINA | JACKSON CO 687     | 35.20 | -83.15 | 1089 | 11.03 | 1994 | 2 |
| 13 | NORTH<br>CAROLINA | BUNCOMBE           | 35.30 | -82.30 | 524  | 13.60 | 1493 | 2 |

**Table S2** Spearman rank correlations (r) between monthly climate variables. The period of analysis is 1993-2014 (n = 22 years). Abbreviations of climatic variables: DC = Drought Code, T = monthly means of daily mean temperatures, P = monthly precipitation totals. Abbreviations for months: 1 = January, 2 = February, 3 = March, ..., 12 = December. ns =  $-0.423 < r < +0.423$ . Shaded areas highlight the analysis between DC and P and T during summer months.

| Variable | DC4   | DC5   | DC6   | DC7   | DC8   | DC9   | DC10  | T1   | T2   | T3   | T4   | T5    | T6   | T7   | T8    | T9    | T10  | T11  | T12   | P1   | P2   | P3   | P4   | P5    | P6   | P7   | P8   | P9   | P10  | P11  | P12  |
|----------|-------|-------|-------|-------|-------|-------|-------|------|------|------|------|-------|------|------|-------|-------|------|------|-------|------|------|------|------|-------|------|------|------|------|------|------|------|
| DC4      | 1.00  |       |       |       |       |       |       |      |      |      |      |       |      |      |       |       |      |      |       |      |      |      |      |       |      |      |      |      |      |      |      |
| DC5      | 0.62  | 1.00  |       |       |       |       |       |      |      |      |      |       |      |      |       |       |      |      |       |      |      |      |      |       |      |      |      |      |      |      |      |
| DC6      | ns    | 0.46  | 1.00  |       |       |       |       |      |      |      |      |       |      |      |       |       |      |      |       |      |      |      |      |       |      |      |      |      |      |      |      |
| DC7      | ns    | ns    | 0.49  | 1.00  |       |       |       |      |      |      |      |       |      |      |       |       |      |      |       |      |      |      |      |       |      |      |      |      |      |      |      |
| DC8      | ns    | ns    | ns    | 0.71  | 1.00  |       |       |      |      |      |      |       |      |      |       |       |      |      |       |      |      |      |      |       |      |      |      |      |      |      |      |
| DC9      | ns    | ns    | ns    | ns    | 0.58  | 1.00  |       |      |      |      |      |       |      |      |       |       |      |      |       |      |      |      |      |       |      |      |      |      |      |      |      |
| DC10     | ns    | -0.55 | -0.46 | ns    | ns    | ns    | 1.00  |      |      |      |      |       |      |      |       |       |      |      |       |      |      |      |      |       |      |      |      |      |      |      |      |
| T1       | ns    | ns    | ns    | 0.43  | ns    | ns    | ns    | 1.00 |      |      |      |       |      |      |       |       |      |      |       |      |      |      |      |       |      |      |      |      |      |      |      |
| T2       | ns    | ns    | ns    | ns    | ns    | ns    | ns    | ns   | 1.00 |      |      |       |      |      |       |       |      |      |       |      |      |      |      |       |      |      |      |      |      |      |      |
| T3       | ns    | ns    | ns    | ns    | ns    | ns    | ns    | ns   | 0.62 | 1.00 |      |       |      |      |       |       |      |      |       |      |      |      |      |       |      |      |      |      |      |      |      |
| T4       | ns    | ns    | ns    | ns    | ns    | ns    | -0.50 | ns   | 0.62 | 0.43 | 1.00 |       |      |      |       |       |      |      |       |      |      |      |      |       |      |      |      |      |      |      |      |
| T5       | 0.63  | 0.47  | ns    | ns    | ns    | ns    | -0.44 | ns   | 0.44 | ns   | ns   | 1.00  |      |      |       |       |      |      |       |      |      |      |      |       |      |      |      |      |      |      |      |
| T6       | ns    | 0.60  | ns    | ns    | ns    | ns    | ns    | ns   | ns   | ns   | ns   | ns    | 1.00 |      |       |       |      |      |       |      |      |      |      |       |      |      |      |      |      |      |      |
| T7       | ns    | ns    | ns    | ns    | ns    | ns    | ns    | 0.47 | ns   | 0.47 | ns   | ns    | ns   | 1.00 |       |       |      |      |       |      |      |      |      |       |      |      |      |      |      |      |      |
| T8       | ns    | ns    | ns    | 0.50  | ns    | ns    | ns    | ns   | ns   | ns   | ns   | ns    | ns   | ns   | 1.00  |       |      |      |       |      |      |      |      |       |      |      |      |      |      |      |      |
| T9       | ns    | ns    | ns    | ns    | ns    | ns    | ns    | ns   | 0.46 | ns   | ns   | ns    | ns   | ns   | ns    | 1.00  |      |      |       |      |      |      |      |       |      |      |      |      |      |      |      |
| T10      | ns    | ns    | ns    | ns    | ns    | ns    | ns    | ns   | ns   | ns   | ns   | ns    | ns   | ns   | ns    | ns    | 1.00 |      |       |      |      |      |      |       |      |      |      |      |      |      |      |
| T11      | ns    | ns    | ns    | ns    | ns    | ns    | ns    | ns   | ns   | ns   | ns   | ns    | ns   | ns   | ns    | ns    | ns   | 1.00 |       |      |      |      |      |       |      |      |      |      |      |      |      |
| T12      | ns    | 0.56  | 0.52  | ns    | ns    | ns    | -0.43 | ns   | ns   | ns   | ns   | ns    | 0.65 | ns   | ns    | ns    | ns   | ns   | 1.00  |      |      |      |      |       |      |      |      |      |      |      |      |
| P1       | ns    | ns    | ns    | ns    | ns    | ns    | ns    | ns   | ns   | ns   | ns   | ns    | ns   | ns   | -0.47 | -0.69 | ns   | ns   | ns    | 1.00 |      |      |      |       |      |      |      |      |      |      |      |
| P2       | -0.66 | ns    | ns    | ns    | ns    | ns    | ns    | ns   | ns   | ns   | ns   | ns    | ns   | ns   | ns    | ns    | ns   | ns   | ns    | ns   | 1.00 |      |      |       |      |      |      |      |      |      |      |
| P3       | ns    | ns    | ns    | ns    | ns    | ns    | ns    | ns   | ns   | ns   | ns   | ns    | ns   | ns   | ns    | ns    | ns   | ns   | ns    | ns   | ns   | 1.00 |      |       |      |      |      |      |      |      |      |
| P4       | ns    | ns    | ns    | ns    | ns    | ns    | ns    | ns   | ns   | ns   | ns   | -0.44 | ns   | ns   | ns    | ns    | ns   | ns   | ns    | ns   | ns   | ns   | 1.00 |       |      |      |      |      |      |      |      |
| P5       | ns    | -0.82 | -0.55 | ns    | ns    | ns    | 0.54  | ns   | ns   | ns   | ns   | ns    | ns   | ns   | ns    | ns    | ns   | ns   | -0.43 | ns   | ns   | ns   | ns   | 1.00  |      |      |      |      |      |      |      |
| P6       | ns    | ns    | -0.48 | -0.74 | ns    | ns    | ns    | ns   | ns   | ns   | ns   | ns    | ns   | ns   | ns    | ns    | ns   | ns   | ns    | ns   | ns   | ns   | ns   | ns    | 1.00 |      |      |      |      |      |      |
| P7       | ns    | ns    | ns    | -0.70 | -0.79 | -0.57 | ns    | ns   | ns   | ns   | ns   | ns    | ns   | ns   | -0.52 | ns    | ns   | ns   | ns    | ns   | ns   | ns   | ns   | ns    | ns   | 1.00 |      |      |      |      |      |
| P8       | ns    | ns    | ns    | ns    | ns    | -0.60 | ns    | ns   | ns   | ns   | ns   | ns    | ns   | ns   | ns    | ns    | ns   | ns   | ns    | ns   | ns   | ns   | ns   | ns    | ns   | ns   | 1.00 |      |      |      |      |
| P9       | ns    | ns    | ns    | ns    | ns    | ns    | -0.72 | ns   | ns   | ns   | 0.53 | ns    | ns   | ns   | ns    | ns    | ns   | ns   | ns    | ns   | ns   | ns   | ns   | -0.44 | ns   | ns   | ns   | 1.00 |      |      |      |
| P10      | ns    | ns    | ns    | ns    | ns    | ns    | ns    | ns   | ns   | ns   | ns   | 0.51  | 0.56 | ns   | ns    | ns    | ns   | ns   | ns    | ns   | ns   | ns   | ns   | ns    | ns   | ns   | ns   | ns   | 1.00 |      |      |
| P11      | ns    | ns    | ns    | ns    | ns    | ns    | ns    | ns   | ns   | ns   | ns   | ns    | ns   | ns   | ns    | ns    | ns   | ns   | ns    | ns   | ns   | ns   | ns   | ns    | ns   | ns   | ns   | ns   | ns   | 1.00 |      |
| P12      | ns    | ns    | ns    | ns    | -0.45 | ns    | ns    | ns   | ns   | ns   | ns   | ns    | ns   | ns   | ns    | ns    | ns   | ns   | ns    | ns   | ns   | ns   | ns   | ns    | ns   | ns   | ns   | ns   | ns   | ns   | 1.00 |

**Table S3** Detailed results of the Genotype Phenotype Association (GPA) analysis with TASSEL (n = 225 trees). For each SNP-trait combinations, p values and marker R<sup>2</sup> are reported. For each trait, three models were tested (1) no correction for population structure; (2) correction for population structure (Q model); and (3) correction for population structure and kinship (Q + K model).

*See accompanying Excel file*

**Table S4** Detailed results of the Genotype Phenotype Association (GPA) analysis with TASSEL when excluding the two populations from the southern group (n = 221 trees).

*See accompanying Excel file*

**Table S5** Comparisons between the number of SNPs detected in GPAs with TASSEL (n = 225 trees) between candidate SNPs (21) and non-candidate SNPs (107).

| Trait                                          | Significance | Candidate SNPs (21) |                                       | Non-candidates SNPs (107) |                                        |
|------------------------------------------------|--------------|---------------------|---------------------------------------|---------------------------|----------------------------------------|
|                                                |              | Number of SNPs      | Percentage of SNPs tested (out of 21) | Number of SNPs            | Percentage of SNPs tested (out of 107) |
| DBH <sub>21</sub>                              | uncertain    | 1                   | 4.762                                 | 2                         | 1.869                                  |
|                                                | likely       | 1                   | 4.762                                 | 0                         | 0.000                                  |
|                                                | very likely  | 0                   | 0.000                                 | 6                         | 5.607                                  |
|                                                | Total        | 2                   | 9.524                                 | 8                         | 7.477                                  |
| H <sub>21</sub>                                | uncertain    | 0                   | 0.000                                 | 0                         | 0.000                                  |
|                                                | likely       | 1                   | 4.762                                 | 0                         | 0.000                                  |
|                                                | very likely  | 0                   | 0.000                                 | 8                         | 7.477                                  |
|                                                | Total        | 1                   | 4.762                                 | 8                         | 7.477                                  |
| MeanBAI <sub>1993-2014</sub>                   | uncertain    | 0                   | 0.000                                 | 0                         | 0.000                                  |
|                                                | likely       | 0                   | 0.000                                 | 1                         | 0.935                                  |
|                                                | very likely  | 1                   | 4.762                                 | 5                         | 4.673                                  |
|                                                | Total        | 1                   | 4.762                                 | 6                         | 5.607                                  |
| BAI <sub>2003</sub>                            | uncertain    | 2                   | 9.524                                 | 1                         | 0.935                                  |
|                                                | likely       | 0                   | 0.000                                 | 0                         | 0.000                                  |
|                                                | very likely  | 3                   | 14.286                                | 5                         | 4.673                                  |
|                                                | Total        | 5                   | 23.810                                | 6                         | 5.607                                  |
| CS <sub>BAI</sub> -Temp.Jul <sub>(t)</sub>     | uncertain    | 0                   | 0.000                                 | 6                         | 5.607                                  |
|                                                | likely       | 1                   | 4.762                                 | 2                         | 1.869                                  |
|                                                | very likely  | 2                   | 9.524                                 | 3                         | 2.804                                  |
|                                                | Total        | 3                   | 14.286                                | 11                        | 10.280                                 |
| CS <sub>BAI</sub> -Prec.Jul <sub>(t)</sub>     | uncertain    | 1                   | 4.762                                 | 0                         | 0.000                                  |
|                                                | likely       | 0                   | 0.000                                 | 0                         | 0.000                                  |
|                                                | very likely  | 1                   | 4.762                                 | 7                         | 6.542                                  |
|                                                | Total        | 2                   | 9.524                                 | 7                         | 6.542                                  |
| CS <sub>BAI</sub> -Drought.Aug <sub>(t)</sub>  | uncertain    | 1                   | 4.762                                 | 1                         | 0.935                                  |
|                                                | likely       | 1                   | 4.762                                 | 1                         | 0.935                                  |
|                                                | very likely  | 1                   | 4.762                                 | 4                         | 3.738                                  |
|                                                | Total        | 3                   | 14.286                                | 6                         | 5.607                                  |
| CS <sub>BAI</sub> -Freeze.Oct <sub>(t-1)</sub> | uncertain    | 2                   | 9.524                                 | 1                         | 0.935                                  |
|                                                | likely       | 1                   | 4.762                                 | 2                         | 1.869                                  |
|                                                | very likely  | 0                   | 0.000                                 | 7                         | 6.542                                  |
|                                                | Total        | 3                   | 14.286                                | 10                        | 9.346                                  |

Supplementary Table 5 (continued)

| Trait                                        | Significance | Candidate SNPs (21) |                                       | Non-candidates SNPs (107) |                                        |
|----------------------------------------------|--------------|---------------------|---------------------------------------|---------------------------|----------------------------------------|
|                                              |              | Number of SNPs      | Percentage of SNPs tested (out of 21) | Number of SNPs            | Percentage of SNPs tested (out of 107) |
| CS <sub>BAl</sub> -Freeze.Jun <sub>(t)</sub> | uncertain    | 2                   | 9.524                                 | 4                         | 3.738                                  |
|                                              | likely       | 2                   | 9.524                                 | 6                         | 5.607                                  |
|                                              | very likely  | 0                   | 0.000                                 | 0                         | 0.000                                  |
|                                              | Total        | 4                   | 19.048                                | 10                        | 9.346                                  |

## REFERENCES

- Jombart T, Devillard S, Balloux F. 2010.** Discriminant analysis of principal components: a new method for the analysis of genetically structured populations. *BMC Genetics* **11**: 94.
- Nadeau S, Godbout J, Lamothe M, Gros-Louis M-C, Isabel N, Ritland K. 2015.** Contrasting patterns of genetic diversity across the ranges of *Pinus monticola* and *P. strobus*: A comparison between eastern and western North American postglacial colonization histories. *American Journal of Botany* **102**: 1342–1355.
- Nadeau S, Meirmans PG, Aitken SN, Ritland K, Isabel N. 2016.** The challenge of separating signatures of local adaptation from those of isolation by distance and colonization history: The case of two white pines. *Ecology and Evolution* **6**: 8649–8664.
